# Supplementary material for: Analyzing the Transcriptomes of Two Quorum-Sensing Controlled Transcription Factors, RcsA and LrhA, Important for Pantoea stewartii Virulence
Source: PLoS One. 2015 Dec 23;10(12):e0145358. doi: 10.1371/journal.pone.0145358 (PMC4689408; doi:10.1371/journal.pone.0145358)
Supplement: S2 Table — (DOCX) [file pone.0145358.s002.docx]

**S2 Table: Primers used for qRT-PCR**

| **Gene** | **Primer** | **Annealing Temp** | **Sequence 5’ to 3’** |
| --- | --- | --- | --- |
| **Genes validated for RcsA regulon** | | | |
| ***argC*** | Cloning-Forward | 55°C | ATCGTTGGTGCCAGTGGTTACG |
| Cloning-Reverse | AGGGAAACCGAAACGAATATTAAGGCAC |
| RT-PCR Forward | 62°C | GTGGAGCAGGGCGCAAA |
| RT-PCR Reverse | AAATACCGTAAGGCTGCAGACTGA |
| **CKS_2806** | Cloning-Forward | 55°C | GAACGCGGTCTGGAACGG |
| Cloning-Reverse | TCAGGCAATGCGTTGGGTG |
| RT-PCR Forward | 64°C | GCGAAGGCCAGAATGTTGACA |
| RT-PCR Reverse | GCTCACGCGACGTGTTACG |
| **CKS_3504** | Cloning-Forward | 55°C | ATGCCAGCCGAAACATCTGCAGCA |
| Cloning-Reverse | TGCCGGGGAGACTGAATGGG |
| RT-PCR Forward | 64°C | GCGTTTTTCGTGCCATGGA |
| RT-PCR Reverse | CACTTTGCCCTGGGTGATCA |
| ***wceG2*** | Previously published [15] | | |
| ***wza*** | Cloning-Forward | 55°C | ATGATTACAATGAAAATGAAGATGATACCTGTTTTGG |
| Cloning-Reverse | TTAGTTCGACCAGTTGCGGATGC |
| RT-PCR Forward | 62°C | gcgaacagcgcgtgtca |
| RT-PCR Reverse | ATGGTTTTGGCTCAGAT |
| **Genes validated for LrhA regulon** | | | |
| **CKS0458** | Previously published [15] | | |
| **CKS_3793** | Cloning-Forward | 57°C | ATGCTAGATATCGTCGAACTGTC |
| Cloning-Reverse | TCTGTTCATGGTGATAGCGC |
| RT-PCR Forward | 64°C | CCTTTGTGGGCCTGTTCTTTTT |
| RT-PCR Reverse | ACCGCCAGATGCTGCACTT |
| **CKS_5208** | Cloning-Forward | 57°C | ATGAAAGTGATTATTGGCGCAC |
| Cloning-Reverse | TCTGTGGGTTTGATTAGCCAG |
| RT-PCR Forward | 60°C | TCAATAACGAACCGCAGTCGAT |
| RT-PCR Reverse | AATCCCTCGCGCGCTTT |
| **CKS_5211** | Cloning-Forward | 57°C | ATGAGTCACGGTTATTCTGTAGTAAAC |
| Cloning-Reverse | TCAACAAAGCCTACCACAGC |
| RT-PCR Forward | 60°C | CATTACGTTTGATCTTCCGTTCTCA |
| RT-PCR Reverse | GACGATATGGCAGCCCTGTTC |
| ***rcsA*** | Cloning-Forward | 55°C | ACTAGTGAAATTCACAACTATCCGGGCATTTTTC |
| Cloning-Reverse | GAGCTCCTATCTTACGTTGACGTAAATACCAG |
| RT-PCR Forward | 60°C | AGCGGAAAATTAAAACGCACAAC |
| RT-PCR Reverse | CAGAGGTCACGTTATCGGTTAAGC |
| **Gene used for normalization of samples** | | | |
| **16S rRNA** | Previously published [15] | | |
